# Supplementary material
Source: ML conference proceedings conference paper supplement (https://openreview.net/forum?id=EXGahWDp1E)
Supplement: supplementary_material [file attachment]

## Sheet: Sheet1
elements types:		dict_type	description		system attributes	types(s)	units	description
generator		<time_series>	{ 'data_type': 'time_series', 'values': { keys are time_indices : value at that time index } }		baseMVA	float	1	System baseMVA for per-unit quantities
load		<cost_curve>	{ 'data_type': 'cost_curve', 'cost_curve_type': 'piecewise', 'values': [ (output_value, cost_value) ] }		reference_bus	any	bus	System reference bus
branch		<cost_curve>	{ 'data_type': 'cost_curve', 'cost_curve_type': 'polynomial', 'values': { keys are coefficient idicies (0, 1, 2, ...) : values are the coefficient for that exponent } }		reference_bus_angle	any	radians	System reference bus angle
dc_branch					time_keys	list	any	List of all valid time indices for any <tims_series>
bus		<fuel_curve>	{'data_type': 'fuel_curve', 'values': [(output_value, fuel_consumed)]}		time_period_length_minutes	int	minutes	Length of time between successive periods
shunt					load_mismatch_cost	float	$/MW	Marginal cost of over generation and load shedding
storage					q_load_mismatch_cost	float	$/MVAr	Marginal cost of over generation and load shedding of reactive power
area					reserve_shortfall_cost	float	$/MW	Marginal cost of reserve shortfall
zone					reserve_requirement	float, <time_series>(float)	MW	System reserve requirement
interface					reserve_shortfall	float, <time_series>(float)	MW	System reserve requirement not met
owner					reserve_price	float, <time_series>(float)	$/MW	System reserve price
					reserve_ramping_constraints	bool	None	If True, enforce shared ramping constraints on ancillary services
					spinning_reserve_requirement	float, <time_series>(float)	MW	System spinning reserve requirement
‘generator’: 'generator_type'					non_spinning_reserve_requirement	float, <time_series>(float)	MW	System non-spinning reserve requirement
renewable					regulation_up_requirement	float, <time_series>(float)	MW	System regulation up reserve requirement
thermal					regulation_down_requirement	float, <time_series>(float)	MW	System regulation down reserve requirement
					flexible_ramp_up_requirement	float, <time_series>(float)	MW	System flexible ramp up requirement
‘branch’: 'branch_type'					flexible_ramp_down_requirement	float, <time_series>(float)	MW	System flexible ramp down requirement
line					supplemental_reserve_requirement	float, <time_series>(float)	MW	System supplemental reserve requirement
transformer					spinning_reserve_shortfall	float, <time_series>(float)	MW	System spinning reserve requirement not met
					non_spinning_reserve_shortfall	float, <time_series>(float)	MW	System non-spinning reserve requirement not met
‘shunt’: 'shunt_type'					regulation_up_shortfall	float, <time_series>(float)	MW	System regulation up reserve requirement not met
controllable					regulation_down_shortfall	float, <time_series>(float)	MW	System regulation down reserve requirement not met
fixed					flexible_ramp_up_shortfall	float, <time_series>(float)	MW	System flexible ramp up requirement not met
					flexible_ramp_down_shortfall	float, <time_series>(float)	MW	System flexible ramp down requirement not met
fuel_supply':'fuel_supply_type'					supplemental_reserve_shortfall	float, <time_series>(float)	MW	System supplemental reserve shortfall
instantaneous					spinning_reserve_price	float, <time_series>(float)	$/MW	System spinning reserve requirement price
					non_spinning_reserve_price	float, <time_series>(float)	$/MW	System non-spinning reserve requirement price
‘generator’:‘renewable’ or 'virtual' attributes:	type(s)	units	description		regulation_up_price	float, <time_series>(float)	$/MW	System regulation up reserve requirement price
p_min	float, <time_series>(float)	MW	Minimum output (at time t)		regulation_down_price	float, <time_series>(float)	$/MW	System regulation down reserve requirement price
p_max	float, <time_series>(float)	MW	Maximum output (at time t)		flexible_ramp_up_price	float, <time_series>(float)	$/MW	System flexible ramp up requirement price
pg	float, <time_series>(float)	MW	Real power output (at time t)		flexible_ramp_down_price	float, <time_series>(float)	$/MW	System flexible ramp down requirement price
qg	float, <time_series>(float)	Mvar	Reactive power output (at time t)		supplemental_reserve_price	float, <time_series>(float)	$/MW	System supplemental reserve price
power_factor	float	1	Power factor for this unit (in [-1,1])		total_cost	float	$	Total operational cost
p_cost	float, <time_series>(float)	$/MWh	Marginal cost for dispatch (at time t) (default is 0)
production_cost	float, <time_series>(float)	$	Total cost for production decisions (in time t)
in_service	bool	1	If False, the generator is offline
fuel	str		Fuel type
bus	any	bus	Attached bus
area	any	area	Attached area
owner	any	owner	Attached owner
zone	any	zone	Attached zone
‘generator’:‘thermal’ attributes:	type(s)	units	description
p_min	float	MW	Minimum real power output when on
p_max	float	MW	Maximum real power output when on
q_min	float	MVAr	Minimum reactive power output when on
q_max	float	MVAr	Maximum reactive power output when on
p_cost	<cost_curve>		Specification of the generator curve cost for real power dispatch
q_cost	<cost_curve>		Specification of the generator curve cost for reactive power dispatch
fuel_cost	float	$/MMBTU	Cost for primary fuel
p_fuel	<fuel_curve>		Specification of the fuel consumed for real power dispatch
startup_cost	<list>(<tuple>(int, float))	(hr, $)	Start-up cost ($) after being off int hours but less than the next category's hours
startup_fuel	<list>(<tuple>(int, float))	(hr, MMBTU)	Fuel consumed for start-up after being off int hours but less than the next category's hours
non_fuel_startup_cost	float	$	Non-fuel cost component for start-up
shutdown_cost	float	$	Shutdown cost
non_fuel_no_load_cost	float	$	Non-fuel cost component of operating
startup_capacity	float	MW	Maximum power avaible given at start_up time (for an hourly time horizon)
shutdown_capacity	float	MW	Maximum power avaible given at shutdown time (for an hourly time horizon)
ramp_up_60min	float	MW/hr	Ramp_up capability in an hour
ramp_down_60min	float	MW/hr	Ramp_down capability in an hour
min_up_time	float, int	hr	Once started, the number of time periods the generator must remain on
min_down_time	float, int	hr	Once stopped, the number of tme periods the generator must remain off
initial_status	float, int (not 0)	hr	Number of time periods the generator has been on (>0) or off (<0) at the initial time period
initial_p_output	float	MW	Real power output at the time preceeding the initial time period
initial_q_output	float	MVAr	Reactive power output at the time preceeding the initial time period
pg	float, <time_series>(float)	MW	Real power output (at time t)
qg	float, <time_series>(float)	Mvar	Reactive power output (at time t)
reserve_supplied	float, <time_series>(float)	MW	Reserve provided (at time t)
headroom	float, <time_series>(float)	MW	The maximum power level the generator could operate at time t given the prior time periods
fast_start	bool	1	A generator capable of providing non-spinning 10-minute reserves
supplemental_start	bool	1	A generator capable of providing non-spinning 30-minute reserves
agc_capable	bool	1	If True, the generator can provide regulation reserve.
ramp_agc	float	MW/min	Automatic response rate for regulation reserve
p_min_agc	float	MW	Minimum real power output when providing regulation reserve
p_max_agc	float	MW	Maximum real power output when providing regulation reserve
agc_fixed_cost	float	$/hr	Cost of operating in AGC mode and potentially providing regulation reserve
agc_marginal_cost	float	$/MW/hr	Marginal cost of providing regulation up/down reserve
spinning_cost	float	$/MW/hr	Marginal cost of providing spinning reserve
spinning_capacity	float	MW	Maximum amount of spinning reserve provided when on
non_spinning_cost	float	$/MW/hr	Marginal cost of providing non-spinning reserve
non_spinning_capacity	float	MW	Maximum amount of non-spinning (10-minute) reserve provided when off
supplemental_cost	float	$/MW/hr	Marginal cost of providing supplemental (spinning or non-spinning) reserves
supplemental_spinning_capacity	float	MW	Maximum amount of spinning supplemental (30-minute) reserve provided when on
supplemental_non_spinning_capacity	float	MW	Maximum amount of non-spinning supplemental (30-minute) reserve provided when off
regulation_provider	float, <time_series>(float)	[0,1]	If 1, the generator is a regulation provider, if 0, not a regulation provider (at time t)
regulation_up_supplied	float, <time_series>(float)	MW	Regulation up provided
regulation_down_supplied	float, <time_series>(float)	MW	Regulation down provided
spinning_reserve_supplied	float, <time_series>(float)	MW	Spinning reserve provided
flexible_ramp_up_supplied	float, <time_series>(float)	MW	Flexible ramp up provided
flexible_ramp_down_supplied	float, <time_series>(float)	MW	Flexible ramp down provided
non_spinning_reserve_supplied	float, <time_series>(float)	MW	Non-spinning reserve provided
supplemental_reserve_supplied	float, <time_series>(float)	MW	Supplemental (spinning or non-spinning) reserve provided
in_service	bool	1	If False, the generator is offline
fixed_commitment	int, <time_series>(int)	{0,1,None}	Fixed commitment status of the generator, if None, the status won't be fixed
fixed_regulation	int, <time_series>(int)	{0,1,None}	Fixed regulation status of the generator, if None, the status won't be fixed
commitment	float, <time_series>(float)	[0,1]	Commitment status of the generator
commitment_cost	float, <time_series>(float)	$	Total cost for commitment decisions (in time t)
production_cost	float, <time_series>(float)	$	Total cost for production decisions (in time t)
fuel_consumed	float, <time_series>(float)	MMBTU	Fuel consumed (in time t)
fuel	str		Fuel type
fuel_supply	any	fuel_supply	Attached fuel_supply
aux_fuel_capable	bool	1	If True, the generator can switch fuel types
aux_fuel	str		Auxillary fuel type
aux_fuel_supply	any	fuel_supply	Auxillary fuel suply
aux_fuel_cost	float	$/MMBTU	Auxillary fuel cost
aux_fuel_blending	bool	1	If True, the generator can blend the aux_fuel and fuel
aux_fuel_online_switching	bool	1	If True, the generator can switch fuel types while on-line
aux_fuel_supply_initial	bool	1	If the generator cannot switch fuel types while on-line, an indicator for if the auxilary fuel is used at the initial time. If False, the primary fuel was assumed to be used.
aux_fuel_consumed	float, <time_series>(float)	MMBTU	Auxillary fuel consumed (in time t)
aux_fuel_status	float, <time_series>(float)	[0,1]	Indicator for if the auxillary fuel is used (in time t)
bus	any	bus	Attached bus
area	any	area	Attached area
owner	any	owner	Attached owner
zone	any	zone	Attached zone
‘storage’ attributes:	type(s)	units	description
energy_capacity	float	MWh	Storage capacity
initial_state_of_charge	float	ratio	(energy in battery)/(storage capacity) at time 0
end_stage_of_charge	float	ratio	(energy in battery)/(storage capacity) at final time period
minimum_state_of_charge	float	ratio	(minimum energy in battery)/(storage capacity)
charge_efficiency	float	ratio	(MWh added to battery)/(MWh applied to battery)
discharge_efficiency	float	ratio	(MWh taken from battery)/(MWh removed from battery)
max_discharge_rate	float	MW	Maximum discharge power (grid side)
min_discharge_rate	float	MW	Minimum discharge power (grid side)
max_charge_rate	float	MW	Maximum charge power (grid side)
min_charge_rate	float	MW	Minimum charge power (grid side)
initial_charge_rate	float	MW	Initial charge power, if not 0 then initial_discharge_rate is 0
initial_discharge_rate	float	MW	Initial discharge power, if not 0 then initial_charge_rate is 0
charge_cost	float	$/MW/hr	Marginal cost for a unit of charge power over an hour (grid side)
discharge_cost	float	$/MW/hr	Marginal cost for a unit of discharge power over an hour (grid side)
retention_rate_60min	float	ratio	(energy in battery after one hour)/(energy in battery now), assuming no charging or discharging
ramp_up_input_60min	float	MW/h	Input ramp_up rate in hours
ramp_down_input_60min	float	MW/h	Input ramp_down rate in hours
ramp_up_output_60min	float	MW/h	Output ramp_up rate in hours
ramp_down_output_60min	float	MW/h	Output ramp_down rate in hours
in_service	bool	1	If False, the storage is offline
state_of_charge	float, <time_series>(float)	ratio	(energy in battery)/(storage capacity) at time t
p_discharge	float, <time_series>(float)	MW	Discharge power at time t (grid side)
p_charge	float, <time_series>(float)	MW	Charge power at time t (grid side)
operational_cost	float, <time_series>(float)	$	Cost of operation at time t
bus	any	bus	Attached bus
area	any	area	Attached area
owner	any	owner	Attached owner
zone	any	zone	Attached zone
‘load’ attributes:	type(s)	units	description
p_load	float, <time_series>(float)	MW	Real power load
q_load	float, <time_series>(float)	MVAr	Reactive power load
p_price	float, <time_series>(float)	$/MWh	If provided, the cost of shedding this load (for price-sensitive loads)
payment_revenue	float, <time_series>(float)	$	Payment from load
in_service	bool	1	If True, load is enabled. If False, the load is not used.
p_load_shed	float, <time_series>(float)	MW	Real power load not met
q_load_shed	float, <time_series>(float)	MVAr	Reactive power load not met
bus	any	bus	Attached bus
area	any	area	Attached area
zone	any	zone	Attach zone
owner	any	owner	Attached owner
‘branch’:‘line’ attributes:	type(s)	units	description
from_bus	any	bus	The attached "from" bus
to_bus	any	bus	The attached "to" bus
resistance	float	ohms (p.u.)	The line resistance
reactance	float	ohms (p.u.)	The line reactance
charging_susceptance	float	ohms (p.u.)	The line charging susceptance
rating_long_term	float	MVA	Long term line apparent power rating
rating_short_term	float	MVA	Short term line apparent power rating
rating_emergency	float	MVA	Emergency line apparent power rating
pf	float, <time_series>{float)	MW	Real power injected at from_bus
qf	float, <time_series>{float)	MVAr	Reactive power injected at from_bus
pt	float, <time_series>{float)	MW	Real power injected at to_bus
qt	float, <time_series>{float)	MVAr	Reactive power injected at to_bus
in_service	bool	1	If True, the line is connected. If False, the line is disconnected
planned_outage	bool, <time_series>(bool)	1	If True, the line is disconnected (at time t)
angle_diff_min	float	radians	Minimum degree difference between the from_bus and to_bus
angle_diff_max	float	radians	Maximum degree difference between the from_bus and to_bus
circuit
owner	any	owner	Attached owner
owner_fraction
‘branch’:‘transformer’ attributes:	type(s)	units	description
from_bus	any	bus	The attached "from" bus
to_bus	any	bus	The attached "to" bus
resistance	float	ohms (p.u.)	The transformer resistance
reactance	float	ohms (p.u.)	The transformer reactance
charging_susceptance	float	ohms (p.u.)	The transfomer charging susceptance
rating_long_term	float	MVA	Long term transformer apparent power rating
rating_short_term	float	MVA	Short term transformer apparent power rating
rating_emergency	float	MVA	Emergency transformer apparent power rating
pf	float, <time_series>{float)	MW	Real power injected at from_bus
qf	float, <time_series>{float)	MVAr	Reactive power injected at from_bus
pt	float, <time_series>{float)	MW	Real power injected at to_bus
qt	float, <time_series>{float)	MVAr	Reactive power injected at to_bus
transformer_tap_ratio	float	1
transformer_magnetizing_conductance	float	ohms (p.u.)
transformer_magnetizing_susceptance	float	ohms (p.u.)
transformer_phase_shift	float	radians
in_service	bool	1	If True, the transformer is connected. If False, the line is disconnected
planned_outage	bool, <time_series>(bool)	1	If True, the transformer is disconnected (at time t)
angle_diff_min	float	radians	Minimum degree difference between the from_bus and to_bus
angle_diff_max	float	radians	Maximum degree difference between the from_bus and to_bus
circuit
owner	any	owner	Attached owner
owner_fraction
‘dc_branch’ attributes:	type(s)	units	description
from_bus	any	bus	The attached "from" bus
to_bus	any	bus	The attached "to" bus
loss_factor	float	1	Loss as a percentage of line flow
rating_long_term	float	MVA	Long term line apparent power rating
rating_short_term	float	MVA	Short term line apparent power rating
rating_emergency	float	MVA	Emergency line apparent power rating
pf	float, <time_series>{float)	MW	Real power injected at from_bus
pt	float, <time_series>{float)	MW	Real power injected at to_bus
in_service	bool	1	If True, the line is connected. If False, the line is disconnected
planned_outage	bool, <time_series>(bool)	1	If True, the line is disconnected (at time t)
‘bus’ attributes:	type(s)	units	description
matpower_bustype	str		One of 'PV', 'PQ', 'ref', or 'isolated'
base_kv	float	kV	Bus voltage base
v_min	float	kV	Minimum bus voltage
v_max	float	kV	Maximum bus voltage
p_balance_violation	float, <time_series>(float)	MW	Shortfall (+) or excess (-) of real power at the bus
q_balance_violation	float, <time_series>(float)	MVAr	Shortfall (+) or excess (-) of reactive power at the bus
vm	float, <time_series>(float)	kV	Bus voltage magnitude
va	float, <time_series>(float)	radians	Bus voltage angle
lmp	float, <time_series>(float)	$/MW	Locational marginal price of real power
q_lmp	float, <time_series>(float)	$/MVAr	Locational marginal price of reactive power
‘shunt’:‘controllable’ attributes:	type(s)	units	description
bus	any	bus	Attached bus
bs_min	float	MVAr injected	Minimum controllable shunt susceptance
bs_max	float	MVAr injected	Maximum controllable shunt susceptance
gs_min	float	MW demanded	Minimum controllable shunt conductance
gs_max	float	MW demanded	Maximum controllable shunt conductance
bs	float, <time_series>{float)	MVar injected	Realized shunt susceptance (at time t)
gs	float, <time_series>{float)	MW demanded	Realized shunt conductance (at time t)
step_count
‘shunt’:‘fixed’ attributes:	type(s)	units	description
bus	any	bus	Attached bus
bs	float	MVAr injected	Fixed shunt susceptance
gs	float	MW demanded	Fixed shunt conductance
‘area’ attributes	types(s)	units	description
spinning_reserve_requirement	float, <time_series>(float)	MW	Area-wide spinning reserve requirement
non_spinning_reserve_requirement	float, <time_series>(float)	MW	Area-wide non-spinning reserve requirement
regulation_up_requirement	float, <time_series>(float)	MW	Area-wide regulation up reserve requirement
regulation_down_requirement	float, <time_series>(float)	MW	Area-wide regulation down reserve requirement
flexible_ramp_up_requirement	float, <time_series>(float)	MW	Area-wide flexible ramp up requirement
flexible_ramp_down_requirement	float, <time_series>(float)	MW	Area-wide flexible ramp down requirement
supplemental_reserve_requirement	float, <time_series>(float)	MW	Area-wide supplemental reserve requirement
spinning_reserve_shortfall	float, <time_series>(float)	MW	Area-wide spinning reserve requirement not met
non_spinning_reserve_shortfall	float, <time_series>(float)	MW	Area-wide non-spinning reserve requirement not met
regulation_up_shortfall	float, <time_series>(float)	MW	Area-wide regulation up reserve requirement not met
regulation_down_shortfall	float, <time_series>(float)	MW	Area-wide regulation down reserve requirement not met
flexible_ramp_up_shortfall	float, <time_series>(float)	MW	Area-wide flexible ramp up requirement not met
flexible_ramp_down_shortfall	float, <time_series>(float)	MW	Area-wide flexible ramp down requirement not met
supplemental_shortfall	float, <time_series>(float)	MW	Area-wide supplemental reserve shortfall
spinning_reserve_price	float, <time_series>(float)	$/MW	Area-wide spinning reserve requirement price
non_spinning_reserve_price	float, <time_series>(float)	$/MW	Area-wide non-spinning reserve requirement price
regulation_up_price	float, <time_series>(float)	$/MW	Area-wide regulation up reserve requirement price
regulation_down_price	float, <time_series>(float)	$/MW	Area-wide regulation down reserve requirement price
flexible_ramp_up_price	float, <time_series>(float)	$/MW	Area-wide flexible ramp up requirement price
flexible_ramp_down_price	float, <time_series>(float)	$/MW	Area-wide flexible ramp down requirement price
supplemental_price	float, <time_series>(float)	$/MW	Area-wide supplemental reserve price
‘zone’ attributes	types(s)	units	description
spinning_reserve_requirement	float, <time_series>(float)	MW	Zonal spinning reserve requirement
non_spinning_reserve_requirement	float, <time_series>(float)	MW	Zonal non-spinning reserve requirement
regulation_up_requirement	float, <time_series>(float)	MW	Zonal regulation up reserve requirement
regulation_down_requirement	float, <time_series>(float)	MW	Zonal regulation down reserve requirement
flexible_ramp_up_requirement	float, <time_series>(float)	MW	Zonal flexible ramp up requirement
flexible_ramp_down_requirement	float, <time_series>(float)	MW	Zonal flexible ramp down requirement
supplemental_reserve_requirement	float, <time_series>(float)	MW	Zonal supplemental reserve requirement
spinning_reserve_shortfall	float, <time_series>(float)	MW	Zonal spinning reserve requirement not met
non_spinning_reserve_shortfall	float, <time_series>(float)	MW	Zonal non-spinning reserve requirement not met
regulation_up_shortfall	float, <time_series>(float)	MW	Zonal regulation up reserve requirement not met
regulation_down_shortfall	float, <time_series>(float)	MW	Zonal regulation down reserve requirement not met
flexible_ramp_up_shortfall	float, <time_series>(float)	MW	Zonal flexible ramp up requirement not met
flexible_ramp_down_shortfall	float, <time_series>(float)	MW	Zonal flexible ramp down requirement not met
supplemental_shortfall	float, <time_series>(float)	MW	Zonal supplemental reserve shortfall
spinning_reserve_price	float, <time_series>(float)	$/MW	Zonal spinning reserve requirement price
non_spinning_reserve_price	float, <time_series>(float)	$/MW	Zonal non-spinning reserve requirement price
regulation_up_price	float, <time_series>(float)	$/MW	Zonal regulation up reserve requirement price
regulation_down_price	float, <time_series>(float)	$/MW	Zonal regulation down reserve requirement price
flexible_ramp_up_price	float, <time_series>(float)	$/MW	Zonal flexible ramp up requirement price
flexible_ramp_down_price	float, <time_series>(float)	$/MW	Zonal flexible ramp down requirement price
supplemental_price	float, <time_series>(float)	$/MW	Zonal supplemental reserve price
‘interface’ attributes	types(s)	units	description
lines	list	line	List of lines on the interface
minimum_limit	float	MVA	Total limit minimum flow limit for the interface
maximum_limit	float	MVA	Total limit maximum flow limit for the interface
pf	float, <time_series>(float)	MW	Interface real power flow
line_orientation	list	1	For each line, the oriention (either 1 or -1) of the line in the interface limit constraint
violation_penalty	float, None	MVA	If None (or attribute does not exist), the limit will be hard; else violations of the limit will be penalized according to this value.
‘fuel_supply’:'instantaneous' attributes	types(s)	units	description
fuel_available	<time_series>(float)	MMBTU	Amount of fuel available from this supply at time t
fuel_consumed	<time_series>(float)	MMBTU	Amount of fuel consumed from this supply at time t
‘interchange’ attributes	types(s)	units	description
bus	str	bus	Bus where the interchange is located
p_min	float, <time_series>(float)	MW	Total limit minimum power from the interchange (negative is power *to* the interchange)
p_max	float, <time_series>(float)	MW	Total limit maximum power from the interchange (negative is power *to* the interchange)
pg	float, <time_series>(float)	MW	Interchange real power generated (negative is real power consumed)
p_cost	float, <time_series>(float)	$/MWh	Marginal cost for interchange power (at time t)
production_cost	float, <time_series>(float)	$	Production cost for interchange power (at time t)
