# Supplementary material
Source: ML conference proceedings conference paper supplement (https://openreview.net/forum?id=EXGahWDp1E)
Supplement: supplementary_material [file attachment]

# Code Description:

## Optimization Proxies using Limited Labeled Data and Training Time—A Semi-Supervised Bayesian Neural Network Approach

### Overview

This document describes the implementation of a **Bayesian Neural Network (BNN)** for solving **Optimal Power Flow (OPF)** problems. The model uses a semi-supervised learning approach to optimize power grid operations by leveraging uncertainty quantification and integrating unlabeled data. The code supports various power grid datasets and configurations for training and testing.

### Usage

You can run the main script by executing:

```
python src/main.py [OPTIONS]
```

For Analysis:

```
python src/analysis.py
```

### Options

The table below describes the available command-line options, which can be obtained using

```
python src/main.py --help
```

Table 1: Command-line Options for BNN-OPF

| Option               | Short | Type    | Description                                                           |
|----------------------|-------|---------|-----------------------------------------------------------------------|
| --datapath           | -p    | TEXT    | Path to the dataset directory.                                        |
| --case               | -c    | TEXT    | Power grid case to solve, e.g., <code>pglib_opf_case118_ieee</code> . |
| --config             | -o    | TEXT    | Path to the configuration file.                                       |
| --numgroups          | -n    | INTEGER | Number of data groups, each with 15,000 points.                       |
| --train              | -r    | INTEGER | Number of training points per group.                                  |
| --test               | -e    | INTEGER | Number of testing points per group.                                   |
| --runtype            |       | TEXT    | Type of run (e.g., <code>semisupervisedBNN</code> ).                  |
| --trackloss          |       | Flag    | Track and save all losses.                                            |
| --debug              |       | Flag    | Enable debug mode.                                                    |
| --warn               |       | Flag    | Enable warning mode.                                                  |
| --error              |       | Flag    | Enable error flag.                                                    |
| --onlydl             |       | Flag    | Only download the data and exit.                                      |
| --install-completion |       | Flag    | Install shell completion for the current shell.                       |
| --show-completion    |       | Flag    | Show shell completion options.                                        |
| --help               |       | Flag    | Show help information and exit.                                       |

### Example

To run the program using a specific dataset, case, and configuration file:

```
python src/main.py --case pglib_opf_case118_ieee --config config.json --train 512
```

This example uses the `pglib_opf_case118_ieee` dataset with 512 training points for training Sandwich BNN.

```

config.json

{
  "batch_size": 1024,
  "initial_learning_rate": 1e-3,
  "decay_rate": 1e-4,
  "max_epochs": 200000,
  "sandwich_rounds": 10,
  "max_training_time": 600,
  "early_stopping_trigger_supervised": 25,
  "early_stopping_trigger_unsupervised": 30,
  "patience_supervised": 3,
  "patience_unsupervised": 5
}

```

## Requirements

The project dependencies are specified as follows:

```

python = "^3.11,<3.13"
typer = "^0.12.3"
logging = "^0.4.9.6"
numpy = "^1.26.0"
scipy = "^1.14.0"
gridx-egret = {path = "Egret"}
torch_geometric =
{git = "https://github.com/pyg-team/pytorch_geometric.git", branch="master"}
tqdm = "^4.66.5"
numpyro = "^0.15.2"
optax = "^0.2.3"
scikit-learn = "^1.5.1"

```

## License

This project is licensed under the MIT License. See the LICENSE file for details.
